# Supplementary material
Source: publisher figshare collection journal article supplement (https://sage.figshare.com/ndownloader/files/24789549)
Supplement: Supplementary file 1 [file 24789549]

Author Response to Reviewer 1

I have reviewed this article and compared it with your previously published article in HERD (2017). You have done a nice job of presenting your study and its findings, and I have a few things for you to consider for editing.

Thank you for the feedback.
Abstract – typically citations are not put into abstracts. I recommend reporting your objective to read: the Importance for Survival Scale (IFSS) was found to be useful… The same comment. Applies to your citation in the methods section. Please change the wording in that sentence to delete the citation. As suggested, I have removed the citations and changed the wording.
Title – I recommend your shortening the title and emphasize the qualitative study. The title has been shortened to emphasize the qualitative study
Page 3, line 47 – there is something wrong with the formatting of the first sentence under methods. Formatting has been fixed.
Page 5, line 24 – power analysis is not needed for qualitative study. I would not include this information since you were only discussing the qualitative study. Discussing quantitative components will only confuse your reader. Reference to power analysis has been removed
page 5, line 28 – I recommend changing "to expand" to "to validate quantitative findings". Qualitative studies are used to validate the quantitative findings. This change has been made
Page 5, line 33 – spell out M in its first use. This change has been made
Page 5, line 36-the information about the sample starting "Proportions”… and ending with "and 12 were retired” is exactly the same as your 2017 article. Since this is self plagiarism, I recommend that you reword this information. This change has been made.
Page 6, line 27 – I am confused. Was the IFSS used as a data collection methodology for the qualitative data, and if no, then this should be deleted. Please tell the reader how you gathered the qualitative information. Was it the same as the 2017 study, and if it was, please make this more clear. If it was the same methodology, you need to explain to the reader how the current study is different than the 2017 study. This comment also relates to other instruments that were used. Was the short version revised restoration scale used in the qualitative study, the quantitative study published in 2017 or both. This is not clear. Because it is yielding a quantitative or numerical answer, I'm not sure I understand how it applies to a qualitative study. Please delete any references to surveys and instruments that were used in the quantitative study, but were not used in the qualitative study. Your qualitative study needs to stand alone. Most of the materials used in the quantitative study were also used in the qualitative study reported here. In line with your suggestions I have made changes to explain data collection methods for the current study more clearly, and to explain how the current qualitative study relates to the previously reported quantitative one.
Page 6, line 46 – the Q sort method needs a citation. A citation has been added.
Page 7, line 45 – APA rules indicate that numbers less than 10 be written out, but numbers 10 and over be presented numerically. You have two different presentations online 45, and I recommend that you change them to numerical. This change has been made.
Page 7, line 45 – you introduce the concept of image set a an image set B, but when this study stands alone without the 2017 article, you need to provide more information about what is included in the image set a and B. Otherwise it gets very confusing for the reader. On line 33, you talk about the SRRS and DASS-21, but this data, if I understand correctly, was not used in the qualitative study. If it was not used, please get rid of anything that speaks to the quantitative study. This same comment applies to the first two sentences under results. You did not use SPSS to analyze any qualitative data, so get rid of those two sentences. You speak about narrative data, but you've never described where this data came from. Please put this information about the narrative data and how it was collected in the data collection section. These issues have been addressed.
Page 9, line 6 – suddenly we are talking about mean scores which is typically seen in a quantitative study but not necessarily in qualitative studies. The same comment applies to the data set B which is poorly defined. You also make mention on this page of the various scenes A5, B1, C6, D8, and E7 but you never define what these scenes are. Again there is discussion of means. – I am concerned that you have a quantitative study here of different variables than you reported in the first study. As written, this article does not read like a typical qualitative study. I have removed the quantitative study that tested the influence of age, gender and stress from this report (apart from a brief overview in the background section, to provide context for the qualitative study as a component of a larger mixed-methods).
Page 19, line 26 – qualitative studies do not talk about reliability. They talk about validity of their methodology and their findings. I recommend that you change the wording. The word reliability has been removed or replaced and validity discussed. I believe that you need to discuss the credibility and authenticity of your study which reflects the meanings and experiences that are lived and perceived by the participants. You also need to discuss the integrity of your study in terms of how you came up with the interpretations, assumptions, and knowledge. Obviously your own background and your first study has the potential to influence the current research process and your interpretation of the findings. You should mention this as a limitation. Since you did not have another qualitative researcher check your findings, the integrity of your study and its findings is in question. You should mention this to in the limitations. This has been mentioned. The thoroughness of the data needs to be discussed. In other words, discussion of sampling and data adequacy and how that contributed to your findings. I didn't find this area of your paper clear at all and it was very mixed up with a quantitative study. There should also be some congruence between the research question, the methods, and the findings. I did not find a research question search question at all. This has been addressed in the objectives section.

The quality in qualitative research is dependent on honest and forthright investigations. If you were going to report the qualitative findings of a mixed methods study, you need to indicate that, and I think you did several times throughout your paper. However if you're going to report it as a separate study, you need to be very clear about your research question, your methodology, your data analysis, and your findings. These issues have been addressed in each . A paragraph of how the qualitative findings either substantiated or challenged your quantitative findings should be included since it was a mixed methods study. This has been addressed in the discussion section.
Once you clean up these issues and make it clear to the reader about the qualitative aspects of this study, I think it will be very useful to the HERD readers currently as written,. I find the article very confusing to follow. I recommend that you find a good qualitative article and use their headings.

I also think you need to add a paragraph or two as to what NEW knowledge this qualitative study adds to the previous knowledge published in 2017. Please see paragraph with heading New knowledge and implications for practice. Again, I thank you for your guidance.
